# Supplementary material for: Diet-Induced Obesity Impairs Endothelium-Derived Hyperpolarization via Altered Potassium Channel Signaling Mechanisms
Source: PLOS journal article supplement (doi:10.1371/journal.pone.0016423), 2011-01-21

**Figure S1. Vessel wall morphology.**

Low magnification electron micrographs of vessel wall cross sections from control (A) and obese (B) animals. For quantitative wall properties, see **Table 2**.

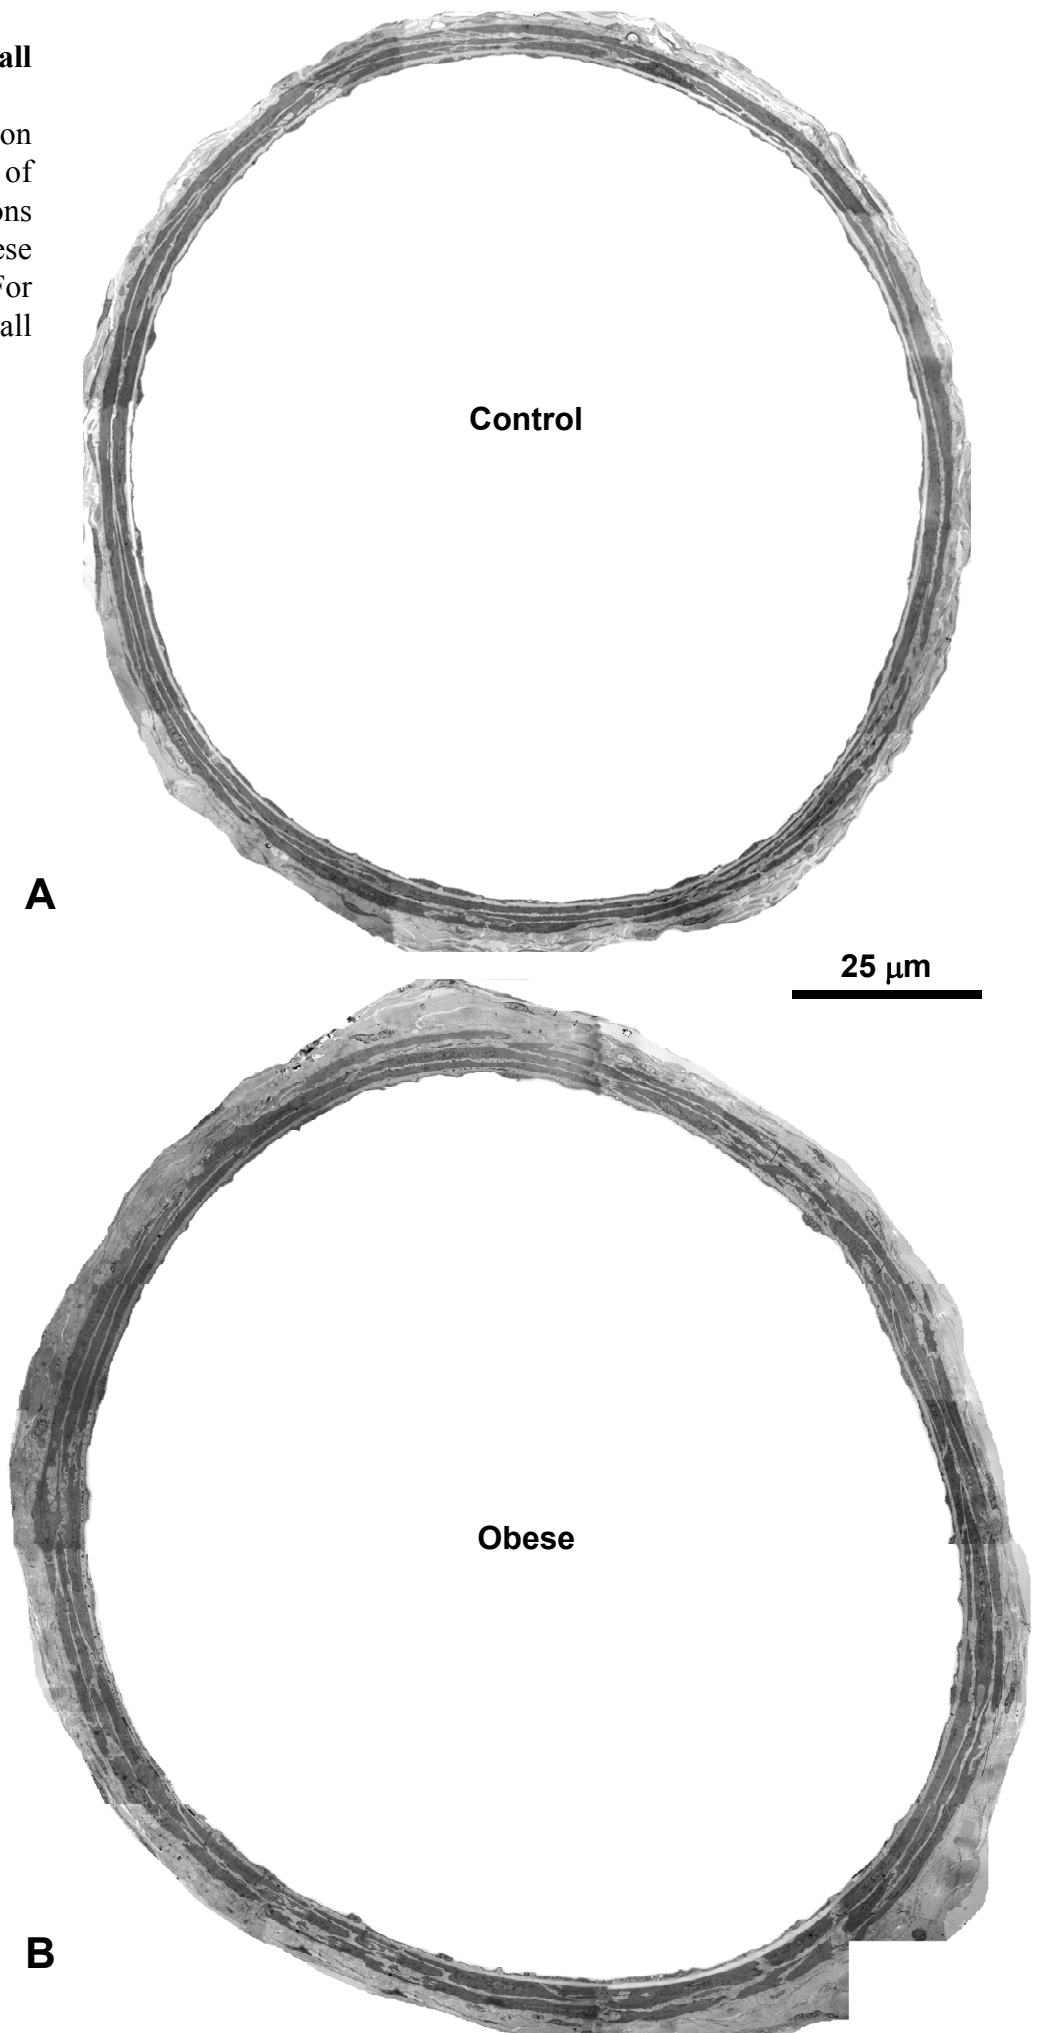

Supplement: S2 (10.1371/journal.pone.0016423.s002) [file journal.pone.0016423.s002]
