# Supplementary material for: Diet-Induced Obesity Impairs Endothelium-Derived Hyperpolarization via Altered Potassium Channel Signaling Mechanisms
Source: PLoS One. 2011 Jan 21;6(1):e16423. doi: 10.1371/journal.pone.0016423 (PMC3025034; doi:10.1371/journal.pone.0016423)
Supplement: Table S4 — Western blot primary antibody characteristics. (DOC) [file pone.0016423.s006.doc]

**Supporting Information**

**Table S4.** Western blot primary antibody characteristics.

| Antigen | Host | Antibody | Source & Identifier | Dilution |
| --- | --- | --- | --- | --- |
| IKCa,# hu N’ aa 2-17 | Rabbit | Affinity purified polyclonal | M20 [1] | 1:250 |
| Actin | Rabbit | Affinity purified polyclonal | Sigma, A2066 | 1:1000 |
| Goat IgG  (Fc portion) | Rabbit | Affinity purified polyclonal AP conjugate | Invitrogen, WB7108 | n/a |

#, as IK1 / SK4 / KCa3.1 / KCNN1. aa, amino acid; AP, alkaline phosphatase; hu, human; n/a, not indicated by manufacturer. IKCa batch M20 was from Mark Chen (GSK, Stevenage, UK).

References

1. Chen MX, Gorman SA, Benson B, Singh K, Hieble JP, et al. (2004) Small and intermediate conductance Ca2+-activated K+ channels confer distinctive patterns of distribution in human tissues and differential cellular localisation in the colon and corpus cavernosum. Naunyn Schmiedebergs Arch Pharmacol 369: 602-615.
