# Supplementary material for: Diet-Induced Obesity Impairs Endothelium-Derived Hyperpolarization via Altered Potassium Channel Signaling Mechanisms
Source: PLoS One. 2011 Jan 21;6(1):e16423. doi: 10.1371/journal.pone.0016423 (PMC3025034; doi:10.1371/journal.pone.0016423)
Supplement: Table S5 — Additional Western blot primary antibody characteristics. (DOC) [file pone.0016423.s007.doc]

**Supporting Information**

**Table S5. Additional Western blot primary antibody characteristics.**

| Antigen | Host | Antibody | Source & Identifier | Dilution |
| --- | --- | --- | --- | --- |
| IKCa,# hu N’ aa 2-17 | Rabbit | Affinity purified polyclonal | M4 [1] | 1:500 |
| IKCa,# rat C’ aa 350-363 | Rabbit | Affinity purified polyclonal | Alomone APC-064 (batch AN-02) | 1:500 |
| IKCa,# rat C’ aa 350-363 | Rabbit | Affinity purified polyclonal | Sigma P4997 (batch 03K1673) | 1:500 |

#, as IK1 / SK4 / KCa3.1 / KCNN1. aa, amino acid. hu, human. IKCa batch M4 was from Mark Chen (GSK, Stevenage, UK).

References

1. Chen MX, Gorman SA, Benson B, Singh K, Hieble JP, et al. (2004) Small and intermediate conductance Ca2+-activated K+ channels confer distinctive patterns of distribution in human tissues and differential cellular localisation in the colon and corpus cavernosum. Naunyn Schmiedebergs Arch Pharmacol 369: 602-615.
